# Supplementary material for: Hyperoxia Reprogrammes Microvascular Endothelial Cell Response to Hypoxia in an Organ-Specific Manner
Source: MDPI journal article supplement (doi:10.3390/cells11162469), 2022-08-09
Supplement: s1 [file s1]

Figure S1

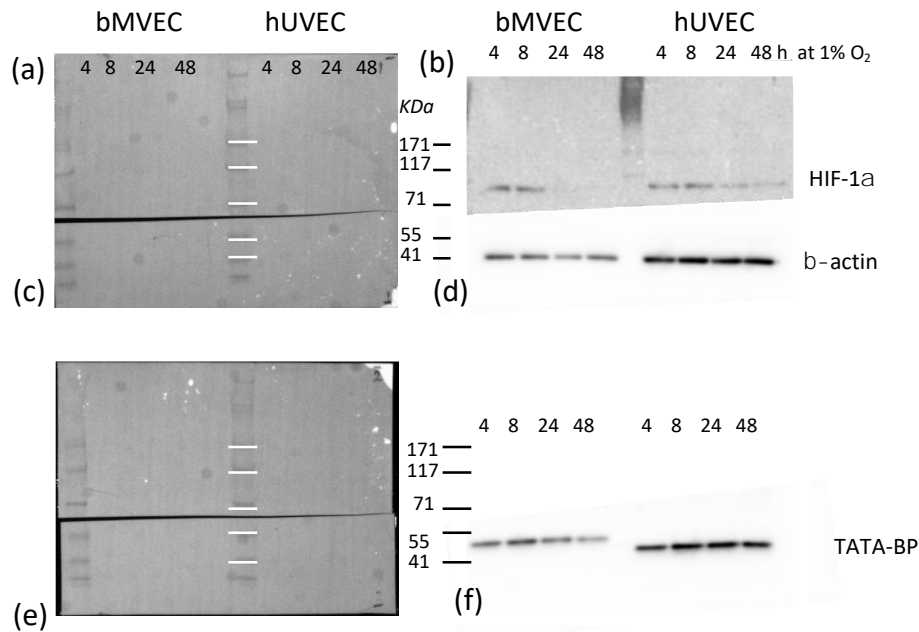

**Validation of  $\beta$ -actin as loading control for nuclear extracts of endothelial cells.** Two gels were loaded with the same nuclear protein extracts of endothelial cells (prepared in same tube, loaded  $\frac{1}{2}$  in each gel), from human (hUVEC) and murine (bMVEC) origin; gels were cut just below the mw standard of 71 KDa, to split between high and low molecular weight proteins; the top half of gel 1 (a) was probed for HIF-1a (b), the bottom (c) was probed for  $\beta$ -actin, shown in panel (d); the lower portion of the cut blot from gel 2 (e) containing the exact same protein as in (c) and (d), was probed for TATA-binding protein. We show TATA-BP in figure 1(c) to show nuclear protein is present, and subsequently used  $\beta$ -actin because of the more consistent signal across all replicates.

Figure S2

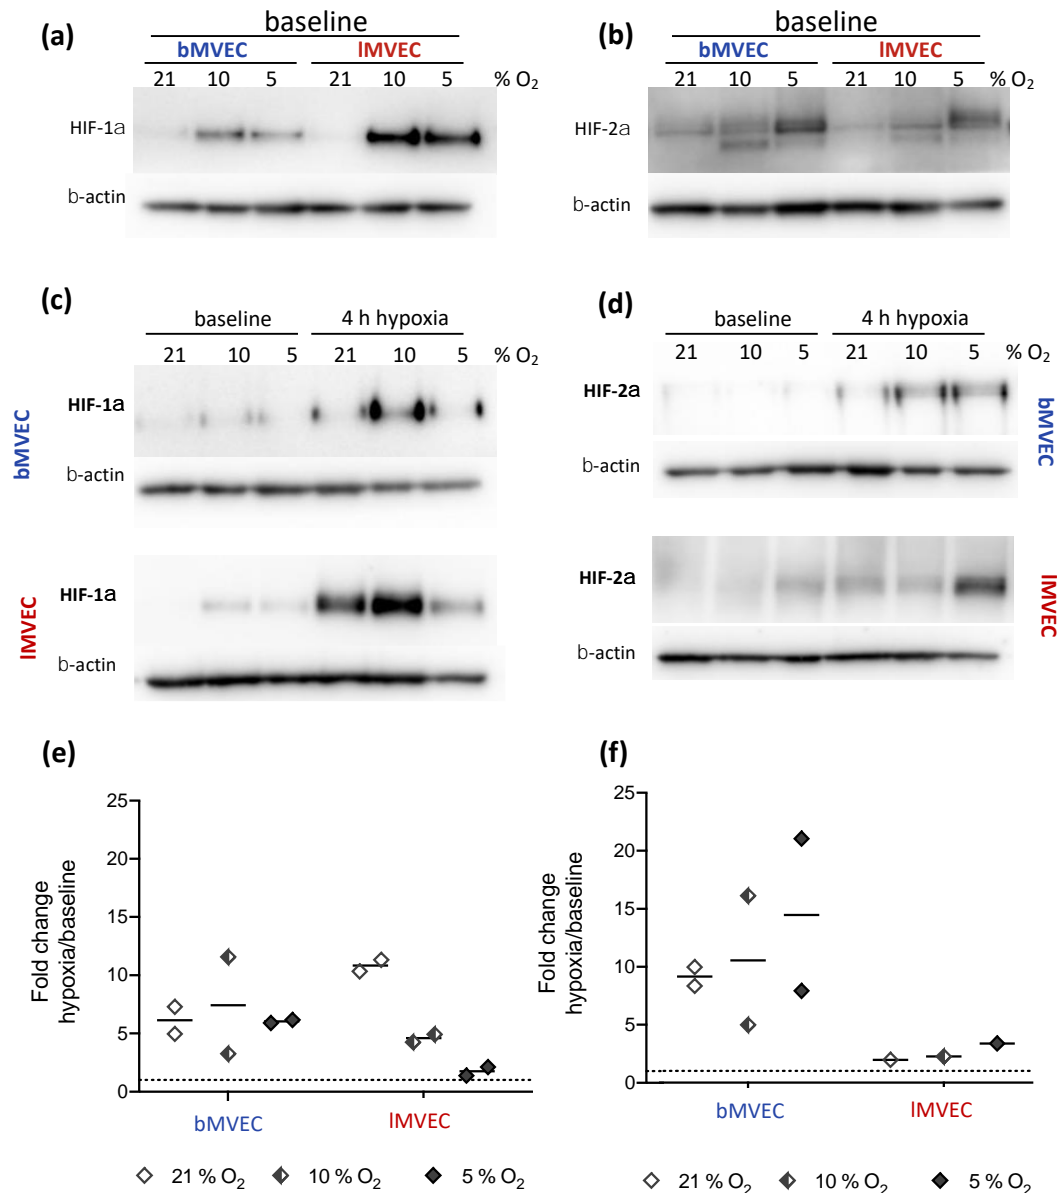

**Figure S2: Baseline and change of HIF- $\alpha$  isoform protein levels is shaped by O<sub>2</sub> priming (related to Figure 2)**

(a, b) Representative western blot showing HIF-1 $\alpha$  (A) and HIF-2 $\alpha$  (B) signal in nuclear extracts of brain and lung MVEC grown at different oxygen levels;  $\beta$ -actin is shown as loading control

(c, d) Representative western blot of HIF-1 $\alpha$  (C) and HIF-2 $\alpha$  (D) signal at baseline and following 4h of hypoxia, from nuclear extracts of brain and lung MVEC expanded at different oxygen levels

(e) Ratio of 4h hypoxia:baseline HIF-1 $\alpha$  signal, normalised to loading control, as displayed in Figure S1C; n=2

(f) Ratio of 4h hypoxia:baseline HIF-2 $\alpha$  signal, normalised to loading control, as displayed in Figure S1D; n=2

Figure S3

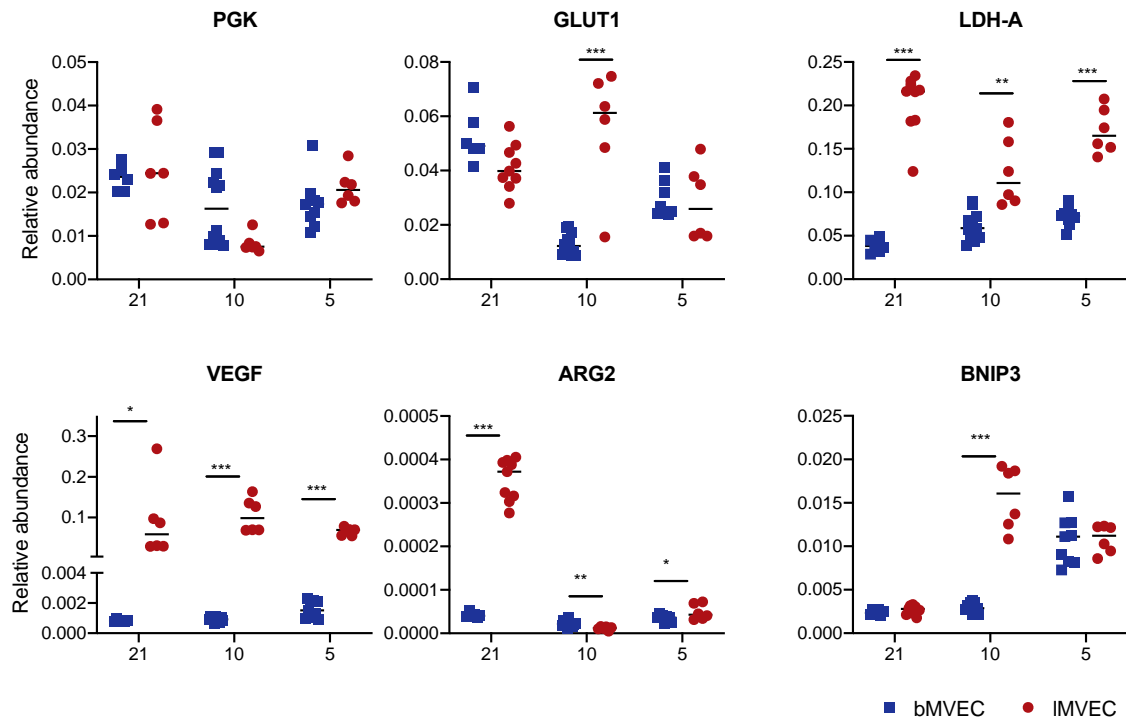

**Figure S3: Relative mRNA abundance of hypoxia response genes under different baseline O<sub>2</sub> conditions (Related to Figure 2)**

Total RNA was isolated from brain and lung MVECs expanded at different oxygen levels (21, 10 and 5 % O<sub>2</sub>). Transcript levels were measured by RT-qPCR and are shown as relative abundance after normalization to the  $\beta$ -actin housekeeping mRNA.  $n \geq 2$  independent experiments with 3 replicates each; statistical significance was assessed by t-tests corrected for multiple comparisons (Holm-Sidak); \* $p < 0.05$ , \*\* $p < 0.01$ , \*\*\* $p < 0.001$

**Table S1: Summary of statistical analyses for figure 2F, using 2-way ANOVA with Holm-Sidak's multiple comparison test on the log10 of fold change. \* $p < 0.05$ , \*\* $p < 0.005$ , \*\*\* $p < 0.001$ , \*\*\*\* $p < 0.0001$ . When comparing lung versus brain, asterisks are colored to match the higher value, when significant. Note: Arg2 mRNA was undetectable in baseline bMVEC at 21% O<sub>2</sub>.**

|                | target       | PGK  |      |      |      | VEGF |      |      |      | GLUT1 |      |      |      |
|----------------|--------------|------|------|------|------|------|------|------|------|-------|------|------|------|
|                | time         | 4h   | 8h   | 24h  | 48h  | 4h   | 8h   | 24h  | 48h  | 4h    | 8h   | 24h  | 48h  |
| bMVEC          | 10 % vs 21 % | **** | **** | **** | **** | **** | **** | **** | **** | ns    | **** | **** | **** |
|                | 5 % vs 21 %  | **** | **** | **** | **** | **** | **** | **** | **** | ns    | ns   | **** | **** |
|                | 10 % vs 5 %  | ns   | *    | **** | **** | ns   | **** | **** | **** | ns    | **** | **** | **** |
| IMVEC          | 10 % vs 21 % | ns   | ns   | **** | **** | ns   | ns   | ns   | **** | ns    | *    | ns   | **** |
|                | 5 % vs 21 %  | ns   | ns   | ns   | **** | ns   | **   | ns   | **** | ns    | ns   | **** | **** |
|                | 10 % vs 5 %  | ns   | ***  | **   | **** | ns   | ***  | ns   | ***  | ns    | ns   | *    | ns   |
| IMVEC vs bMVEC | 21%          | **** | ***  | **** | **** | **   | **   | **** | *    | ns    | ns   | **** | **** |
|                | 10%          | ns   | ns   | ns   | ns   | ***  | **** | **** | **** | ns    | **** | ***  | ns   |
|                | 5%           | ns   | **   | **** | **   | **** | **** | *    | ns   | ns    | ns   | **** | **** |
|                | target       | ARG2 |      |      |      | LDH  |      |      |      | BNIP3 |      |      |      |
|                | time         | 4h   | 8h   | 24h  | 48h  | 4h   | 8h   | 24h  | 48h  | 4h    | 8h   | 24h  | 48h  |
| bMVEC          | 10 % vs 21 % | **   | **** | **** | -    | ns   | ns   | **** | **** | ****  | **** | ns   | *    |
|                | 5 % vs 21 %  | ns   | *    | **** | -    | ns   | ns   | ns   | ns   | **    | **** | **** | **** |
|                | 10 % vs 5 %  | *    | **** | **** | ***  | ns   | ns   | **** | **** | ns    | **** | **** | **** |
| IMVEC          | 10 % vs 21 % | ns   | **   | ns   | **** | **   | ns   | **** | **** | ns    | *    | **   | **** |
|                | 5 % vs 21 %  | ns   | ns   | ns   | **** | ns   | *    | ns   | ns   | ns    | ns   | **   | ***  |
|                | 10 % vs 5 %  | ns   | ***  | **   | ns   | **** | **** | ***  | **** | ns    | ns   | ns   | ***  |
| IMVEC vs bMVEC | 21%          | ns   | **   | **** | -    | *    | ns   | ns   | ns   | **    | **** | **** | **** |
|                | 10%          | ns   | ***  | ns    | **** | **** | ***  |
|                | 5%           | ns   | ns   | ns   | ns   | ns   | *    | ns   | ns   | ns    | ns   | **** | ns   |

Figure S4

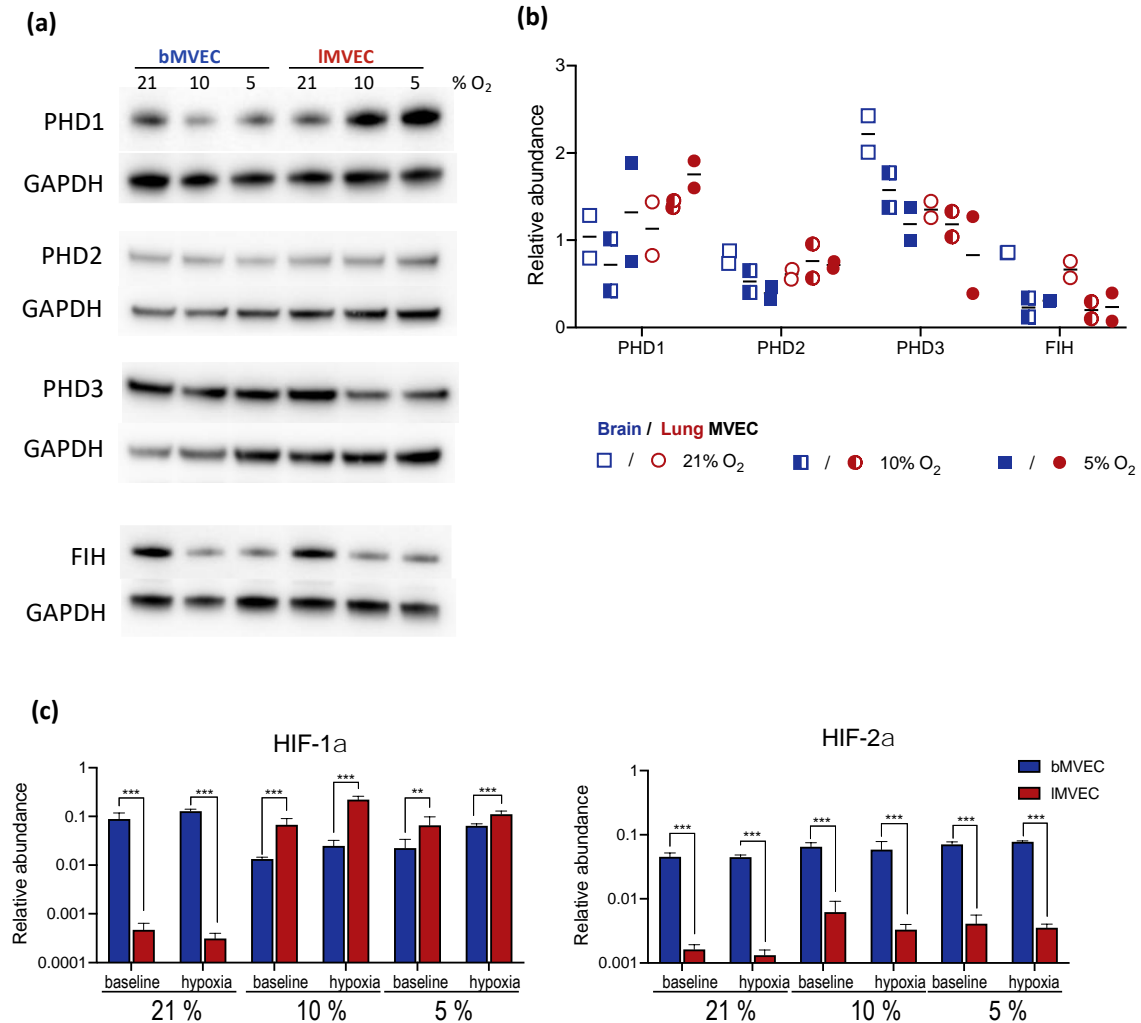

**Figure S4: Upstream regulation of HIF- $\alpha$  is mildly affected by  $O_2$  but is not tissue-specific (Related to Figure 2)**

(a) Representative image of western blot probed for enzymes responsible for HIF protein stabilization (prolyl hydroxylases, PHD1-3) and HIF transcriptional activity (factor inhibiting HIF, FIH) using whole-cell protein lysate.

(b) Signal from (A) was quantified by densitometry and normalised to loading control, GAPDH. (n=2)

(c) Comparison of HIF-1 $\alpha$  and HIF-2 $\alpha$  mRNA levels MVEC from lung and brain, expanded in different oxygen levels, at baseline and after 4h at 1%  $O_2$ . Transcript levels were quantified by RT-qPCR and are displayed as average  $\pm$  SD relative abundance compared to the  $\beta$ -actin housekeeping gene (n=3); statistical significance assessed by t-tests corrected for multiple comparisons (Holm-Sidak); \*\*p<0.01, \*\*\*p<0.001

Figure S5

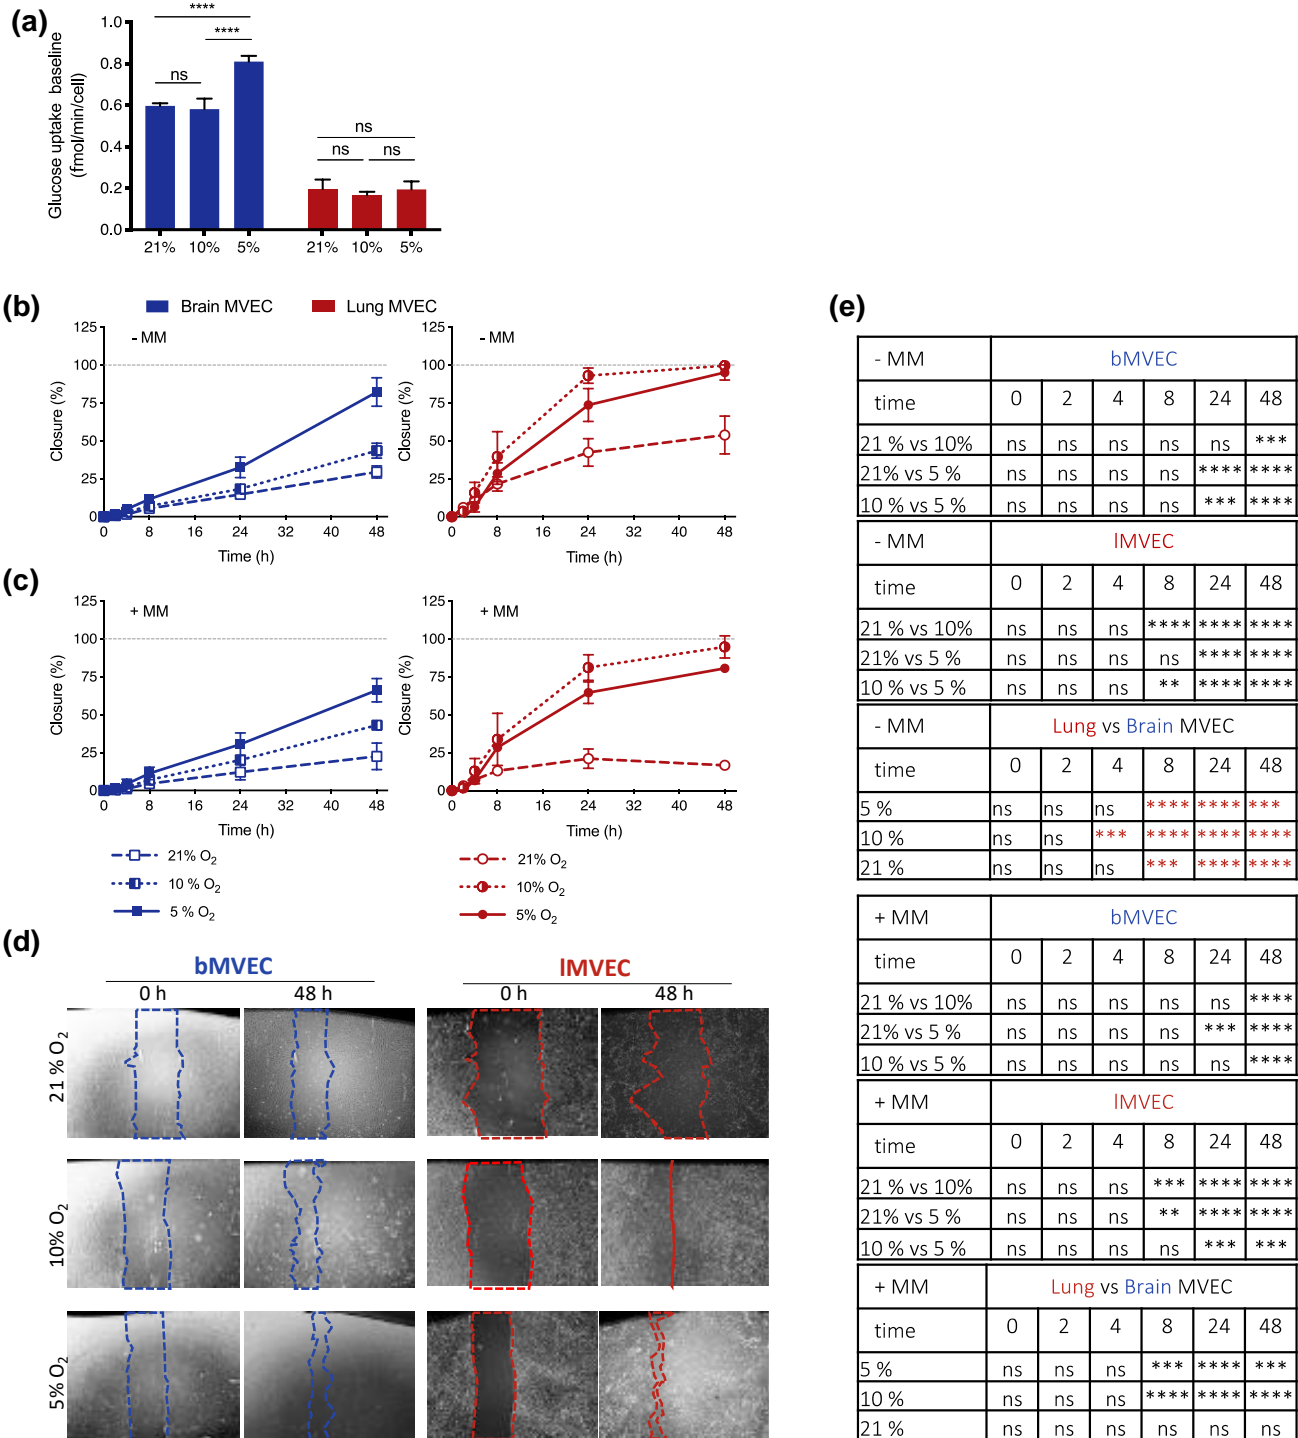

Figure S5: Oxygen effects on glucose uptake and cell migration

(a) Baseline glucose uptake was quantified in lung and brain MVEC maintained in different O<sub>2</sub> conditions. Displayed as average  $\pm$  SD, statistical analysis using 2-way ANOVA with Holm-Sidak's multiple comparison test, \*\*\*\*p<0.0001 (Related to Figure 3)

(b) Wound closure assays were performed using brain and lung MVEC expanded at different O<sub>2</sub> levels; wounds were applied using a P1000 tip at t=0 and images taken at regular intervals. Quantification of wound closure was made in monolayers treated with DMSO (B) or 10 mM Mitomycin C (c) for 2h before the scratch was applied.

(d) Representative images of wells during migration assay in the presence of Mitomycin C at the start and end of assay.

(e) Summary of statistical analyses for data in B,C; 2-way ANOVA. Multiple comparisons using Holm-Sidak correction; \*\*p<0.005, \*\*\*p<0.001, \*\*\*\*p<0.0001, n= 4.

Figure S6

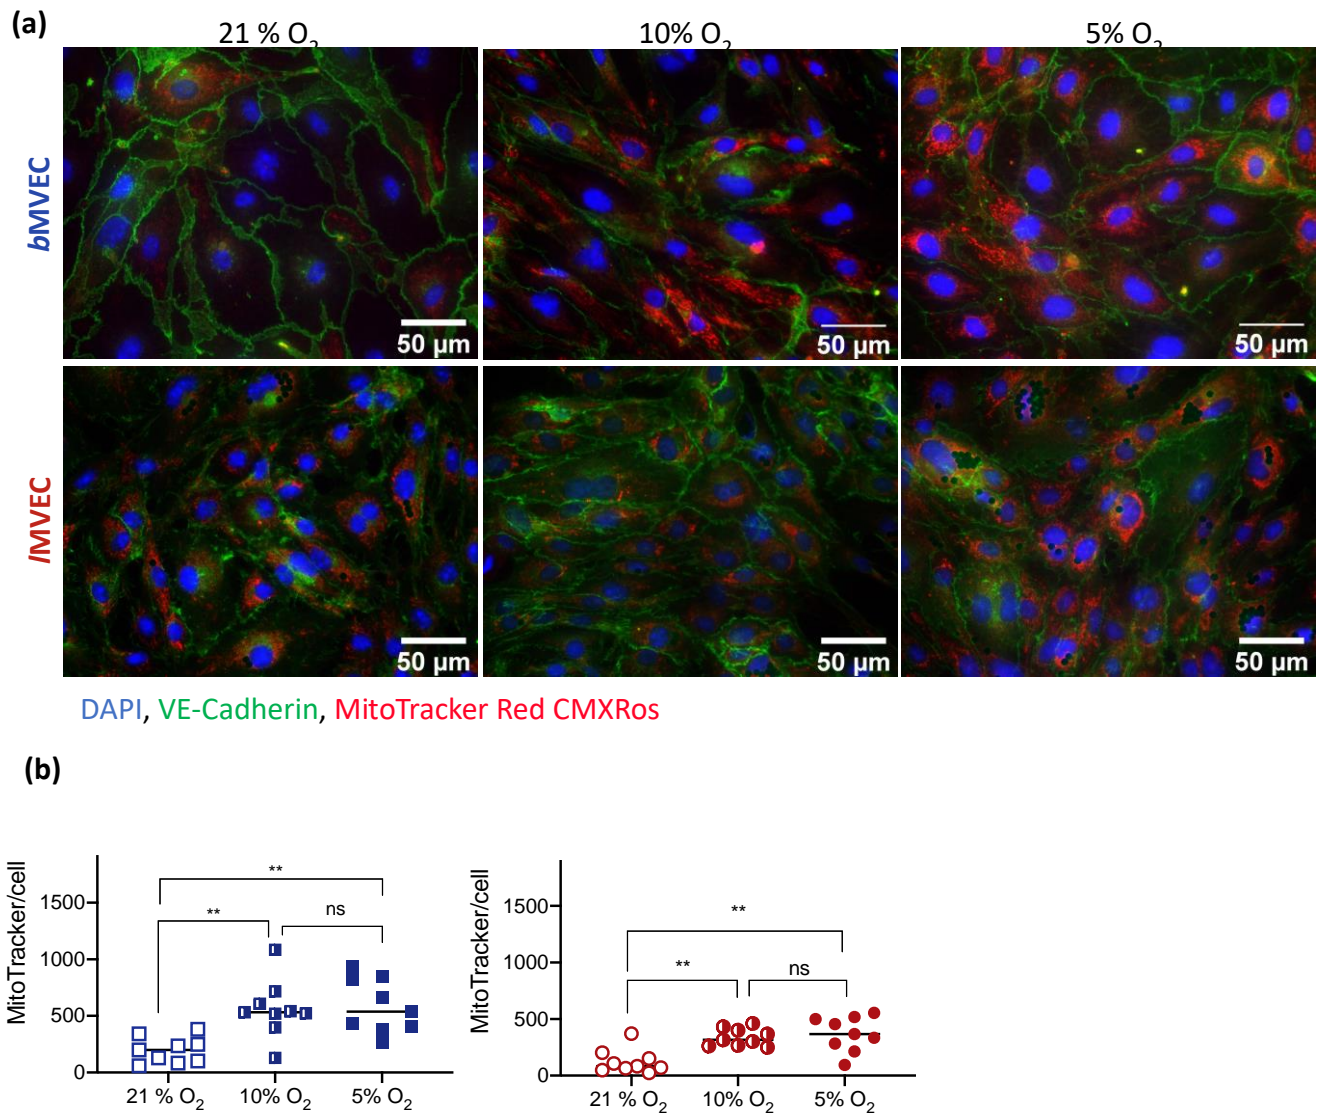

**Figure S6: Mitochondrial activity is impaired by excess O<sub>2</sub>**

(a) Representative images of brain and lung MVEC expanded at different O<sub>2</sub> levels, stained for EC marker VE-Cadherin (green), mitochondrial membrane potential (MitoTracker Red CMXRos, red) and counter-stained with DAPI (blue)

(b) Quantification of the MitoTracker stain shown in (a) for *b*MVEC (left, blue) and *l*MVEC (right, red); different thresholds were used for the two cell populations; n=10 pictures from a single biological control. Statistical analysis using 2-way ANOVA with Holm-Sidak's multiple comparison test (\*\*p<0.005)

**Table S2: Summary of Reagents and Resources**

| REAGENT/RESOURCE                                     | REFERENCE/SOURCE          | IDENTIFIER or CATALOGUE NUMBER |
|------------------------------------------------------|---------------------------|--------------------------------|
| <b>Antibodies</b>                                    |                           |                                |
| $\beta$ -actin (clone AC-15)                         | Sigma-Aldrich             | Cat# A1978                     |
| CD31 (clone MEC 13.3)                                | BD Pharmingen             | Cat# 553370                    |
| FIH (clone D19B3)                                    | Cell Signaling Technology | Cat# 4426S                     |
| GAPDH (clone G-9)                                    | Santa Cruz Biotechnology  | Cat# sc-365062                 |
| HIF-1 $\alpha$                                       | Novus Biologicals         | Cat# NB100-449                 |
| HIF-2 $\alpha$                                       | R&D Systems               | Cat# AF2997                    |
| PHD1 (clone EPR2746)                                 | Abcam                     | Cat# ab113077                  |
| PHD2                                                 | Novus Biologicals         | Cat# NB100-2219                |
| PHD3                                                 | Novus Biologicals         | Cat# NB100-303                 |
| TATA-BP                                              | Abcam                     | Cat# ab63766                   |
| VE-Cadherin                                          | R&D Systems               | Cat# AF1002                    |
| Goat IgG - HRP conjugated                            | Santa Cruz Biotechnology  | Cat# sc-2304                   |
| Mouse IgG - HRP conjugated                           | Santa Cruz Biotechnology  | Cat# sc-2314                   |
| Rabbit IgG - HRP conjugated                          | R&D Systems               | Cat# HAF008                    |
| Goat IgG, conjugated with Alexa Fluor 488            | ThermoFisher Scientific   | Cat# A-11055                   |
| <b>Chemicals, Peptides, and Recombinant Proteins</b> |                           |                                |
| 0.25% Trypsin                                        | ThermoFisher Scientific   | Cat# 25200056                  |
| 2-deoxy glucose                                      | Sigma                     | Cat# D6134                     |
| Acetone                                              | Sigma                     | Cat# 24201                     |
| Adam-MC cell viability stain                         | NanoEnTek                 | Cat# ADR-1000                  |
| Amersham ECL Western Blotting Detection Reagent      | Sigma                     | Cat# GERPN2209                 |
| Antimycin A                                          | Sigma                     | Cat# A8674                     |
| BSA                                                  | Sigma                     | Cat# A7906                     |
| Collagen I                                           | Sigma                     | Cat# C4243                     |
| Collagenase A                                        | Roche                     | Cat# 11088793001               |
| Collagenase/Dispase                                  | Roche                     | Cat# 10269638001               |
| cOmplete™ Protease Inhibitor Cocktail                | Roche                     | Cat# 11697498001               |
| Dnase I                                              | Roche                     | Cat# 11284932001               |
| Donkey Serum                                         | Sigma                     | Cat# 566460                    |
| Dynabeads coated with sheep anti-rat IgG             | ThermoFisher Scientific   | Cat# 11035                     |
| Endothelial cell growth supplement                   | Sigma                     | Cat# E2759                     |
| F12 HAM nutrient mixture                             | Sigma                     | Cat# 51651C                    |
| FBS                                                  | Gibco                     | Cat# 10270106                  |
| FCCP                                                 | Sigma                     | Cat# C2920                     |
| Glucose                                              | Sigma                     | Cat# G8769                     |
| HBSS                                                 | ThermoFisher Scientific   | Cat# 14175129                  |
| Heparin                                              | Sigma                     | Cat# H3149                     |
| HEPES                                                | Sigma                     | Cat# 15630-056                 |
| Low-glucose DMEM                                     | Sigma                     | Cat# D6046                     |
| Mitomycin C                                          | Sigma                     | Cat# D6046                     |
| MitoTracker Red CMXRos                               | ThermoFisher Scientific   | Cat# M7512                     |
| NE-PER™ Nuclear and Cytoplasmic Extraction Reagents  | ThermoFisher Scientific   | Cat# 78833                     |
| Non-essential amino acids                            | Sigma                     | Cat# M7145                     |
| NuPAGE™ 3-8% Tris-Acetate Protein Gels               | ThermoFisher Scientific   | Cat# EA0375BOX                 |
| NuPAGE™ 4-12% Bis-Tris Protein Gels                  | ThermoFisher Scientific   | Cat# NP0321BOX                 |
| NuPAGE™ LDS Sample Buffer (4X)                       | ThermoFisher Scientific   | Cat# NP0007                    |
| NuPAGE™ Sample Reducing Agent (10X)                  | ThermoFisher Scientific   | Cat# NP0004                    |
| Oligomycin                                           | Sigma                     | Cat# O4876                     |

| REAGENT/RESOURCE                                        | REFERENCE/SOURCE        | IDENTIFIER or CATAOGUE NUMBER                           |
|---------------------------------------------------------|-------------------------|---------------------------------------------------------|
| Pierce™ ECL Western Blotting Substrate                  | ThermoFisher Scientific | Cat# 32209                                              |
| Power Blotter Select Transfer Stacks, PVDF              | ThermoFisher Scientific | Cat# PB5310                                             |
| ProLong Diamond Antifade with DAPI                      | ThermoFisher Scientific | Cat# P36962                                             |
| Puromycin Dihydrochloride                               | Sigma                   | Cat# P8833                                              |
| Rotenone                                                | Sigma                   | Cat# R8875                                              |
| Seahorse XF base medium                                 | Agilent                 | Cat# 103334-100                                         |
| Sodium pyruvate                                         | ThermoFisher Scientific | Cat# 11360039                                           |
| Trans-Blot® Turbo™ Mini PVDF Transfer Packs             | Bio-Rad                 | Cat# 1704156                                            |
| Triton-X100                                             | Sigma                   | Cat# T8787                                              |
| Tween                                                   | VWR Chemicals           | Cat# 9005-64-5                                          |
| Critical Commercial Assays                              |                         |                                                         |
| RealTime-Glo™ MT Cell Viability Assay                   | Promega                 | Cat# G9711                                              |
| RNeasy isolation kit                                    | Qiagen                  | Cat# 74106                                              |
| SuperScript III reverse transcriptase kit               | ThermoFisher Scientific | Cat# 18080093                                           |
| Pierce™ BCA Protein Assay Kit                           | ThermoFisher Scientific | Cat# 23227                                              |
| Glucose Uptake-Glo™ Assay                               | Promega                 | Cat# J1341                                              |
| Succinate Dehydrogenase Activity Assay Kit              | Abcam                   | Cat# ab228560                                           |
| Succinate Assay Kit                                     | Abcam                   | Cat# ab204718                                           |
| Experimental Models: Cell Lines                         |                         |                                                         |
| Primary Microvascular murine EC                         | This paper              |                                                         |
| Experimental Models: Organisms/Strains                  |                         |                                                         |
| C57/BL6 WT mouse                                        | In house breeding       |                                                         |
| Oligonucleotides                                        |                         |                                                         |
| Arginase II primer fwd ACCAGGAAGTGGCTGAAGTG             | [100]                   |                                                         |
| Arginase II primer rev TGAGCATCAACCCAGATGAC             |                         |                                                         |
| β-actin primer fwd AGAGGGAAATCGTGCGTGAC                 | [101]                   |                                                         |
| β-actin primer rev CAATAGTGATGACCTGGCCGT                |                         |                                                         |
| β-actin probe<br>/FAM/CACTGCCGCATCCTCTTCTCCC/BHQa-Q/    | [47]                    |                                                         |
| BNIP3 primer fwd GACGAAGTAGCTCCAAGAGTTCTCA              |                         |                                                         |
| BNIP3 primer rev<br>CTATTTCAGCTCTGTTGGTATCTTGTG         | [102]                   |                                                         |
| Epas1 primer fwd GTCCGAAGGAAGCTGATGG                    |                         |                                                         |
| Epas1 primer rev TCTATGAGTTGGCTCATGAGTTG                | [41]                    |                                                         |
| Epas1 probe<br>/FAM/CCACCTGGACAAAGCCTCCATCAT/36-TAMSp/  |                         |                                                         |
| GLUT-1 primer fwd GGGCATGTGCTTCCAGTATGT                 | [41]                    |                                                         |
| GLUT-1 primer rev ACGAGGAGCACCGTGAAGAT                  |                         |                                                         |
| GLUT-1 probe<br>/FAM/CAACTGTGCGGCCCTACGTCTTC/BHQ/       | [103]                   |                                                         |
| HIF-1α primer fwd GGTGCTGGTGTCACAAATGTAG                |                         |                                                         |
| HIF-1α primer rev<br>ATGGGTCTAGAGAGATAGCTCCACA          | [41]                    |                                                         |
| HIF-1α probe<br>/FAM/CCTGTTGGTTGCGCAGCAAGCATT/36-TAMSp/ |                         |                                                         |
| iNOS primer fwd ACCCTAAGAGTCACCAAAATGGC                 | [41]                    |                                                         |
| iNOS primer rev TTGATCCTCACATACTGTGGACG                 |                         |                                                         |
| LDH-A primer fwd TGTCTCCAGCAAAGACTACTGT                 | [41]                    |                                                         |
| LDH-A primer rev GACTGTACTTGACAATGTTGGGA                |                         |                                                         |
| PGK primer fwd CAAATTGATGAGAATGCCAAGACT                 | [41]                    |                                                         |
| PGK primer rev TTCTTGCTGCTCTCAGTACCACA                  |                         |                                                         |
| PGK probe<br>/FAM/TATACCTGCTGGCTGGATGGGCTTGGACT/BHQa-Q/ | [41]                    |                                                         |
| VEGF primer fwd TGAAGCCCTGGAGTGCGT                      |                         |                                                         |
| VEGF primer rev AGGTTTGATCCGCATGATCTG                   | [41]                    |                                                         |
| VEGF probe<br>/FAM/CCCACGTCAGAGAGCAACATCACCA/BHQa-Q/    |                         |                                                         |
| Software and Algorithms                                 |                         |                                                         |
| ImageJ                                                  | [104]                   | https://imagej.nih.gov/ij/                              |
| Mars Version NO. 3.32R                                  | BMG Labtech             | https://www.bmglabtech.com/mars-data-analysis-software/ |



| REAGENT/RESOURCE                 | REFERENCE/SOURCE           | IDENTIFIER or CATALOGUE NUMBER                                                                                                                                                                                                |
|----------------------------------|----------------------------|-------------------------------------------------------------------------------------------------------------------------------------------------------------------------------------------------------------------------------|
| Wave 2.6                         | Agilent Technologies, Inc. | <a href="https://www.agilent.com/en/products/cell-analysis/cell-analysis-software/data-analysis/wave-desktop-2-6">https://www.agilent.com/en/products/cell-analysis/cell-analysis-software/data-analysis/wave-desktop-2-6</a> |
| Prism 9                          | GraphPad Software, Inc.    | <a href="https://www.graphpad.com/scientific-software/prism/">https://www.graphpad.com/scientific-software/prism/</a>                                                                                                         |
| Other                            |                            |                                                                                                                                                                                                                               |
| FLUOstar Omega microplate reader | BMG Labtech                | <a href="https://www.bmglabtech.com/fluostar-omega/">https://www.bmglabtech.com/fluostar-omega/</a>                                                                                                                           |
| Whitley H35 Hypoxystation        | Don Whitley Scientific     | <a href="https://www.dwscientific.com/whitley-hypoxic-workstations/h35-hypoxystation">https://www.dwscientific.com/whitley-hypoxic-workstations/h35-hypoxystation</a>                                                         |
| Seahorse XFe96 Analyzer          | Agilent Technologies, Inc. | <a href="https://www.agilent.com/en/products/cell-analysis/seahorse-analyzers/seahorse-xfe96-analyzer">https://www.agilent.com/en/products/cell-analysis/seahorse-analyzers/seahorse-xfe96-analyzer</a>                       |
| Seahorse XF24-3 Analyzer         | Agilent Technologies, Inc. | Discontinued                                                                                                                                                                                                                  |
| Trans-Blot Turbo Transfer System | Bio-Rad                    | Cat# 1704150                                                                                                                                                                                                                  |
| Power Blotter XL System          | ThermoFisher Scientific    | Cat# PB0013                                                                                                                                                                                                                   |
